# Supplementary material
Source: PubMed Central journal article supplement (PMC1323172)

□ Saline  
■ Hypocretin-1 (1.5 nmol)

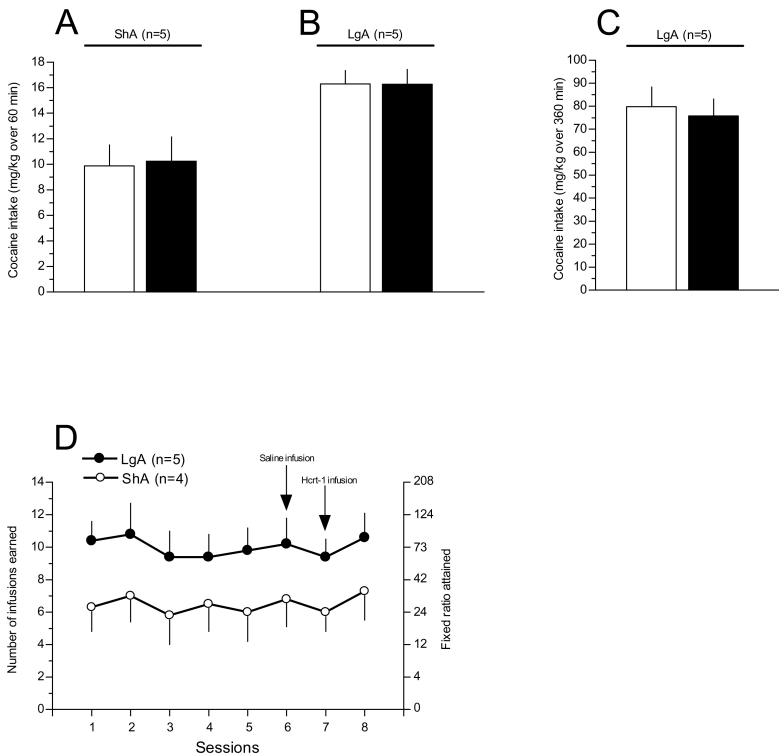

Supplement: pnas_0507480102_1.pdf [file pnas_0507480102_1.pdf]
